# Supplementary material
Source: PubMed Central journal article supplement (PMC4004257)
Supplement: ja408138f_si_001.pdf [file ja408138f_si_001.pdf]

## Supporting Information

### Assigning the EPR Fine Structure Parameters of the Mn(II) Centers in *Bacillus subtilis* Oxalate Decarboxylase by Site-Directed Mutagenesis and DFT/MM Calculations

Pablo Campomanes, Whitney F. Kellett, Lindsey M. Easton, Andrew Ozarowski, Karen N. Allen,  
Alexander Angerhofer, Ursula Rothlisberger, and Nigel G. J. Richards

Laboratory of Computational Chemistry and Biochemistry, Federal Institute of Technology, EPFL, CH-1015 Lausanne, Switzerland, the Department of Chemistry & Chemical Biology, Indiana University Purdue University Indianapolis, Indianapolis, IN 46202, United States, the Department of Chemistry, Boston University, Boston, MA 32310, United States, the Department of Chemistry, University of Florida, Gainesville, FL 32611, United States, and the National High Magnetic Field Laboratory, Florida State University, Tallahassee, FL 32310, United States

**Table S1.** EPR zfs parameters for C-terminally His<sub>6</sub>-tagged, WT OxDC and the Mn(II)-containing W132F OxDC variant at pH 8.5.<sup>a</sup> *D* and *E* are obtained from low-resolution spectra (3 K) while *g* and *A* are obtained from high-resolution spectra.

|                 | <i>D</i> (MHz) | <i>E/D</i> | <i>g</i> | <i>A</i> <sub>iso</sub> (MHz) | Linewidth (G) | Weight (%) |
|-----------------|----------------|------------|----------|-------------------------------|---------------|------------|
| WT OxDC site I  | -1350          | 0.15       | 2.00089  | 251.3                         | 6             | 68         |
| WT OxDC site II | 10430          | 0.20       | 2.00080  | 250.0                         | 4             | 32         |
| W132F site I    | -1950          | 0.21       | 2.00089  | 251.3                         | 6             | 69         |
| W132F site II   | 10430          | 0.20       | 2.00080  | 250.0                         | 4             | 31         |

<sup>a</sup> Other EasySpin<sup>1</sup> simulation parameters used to obtain EPR zfs values:

(1) WT OxDC (site I): Hstrain<sub>iso</sub> = 20 MHz, *E* = 200 MHz, Dstrain = 0.4×|*D*|, Estrain = 4×|*E*|

(2) WT OxDC (site II): Hstrain<sub>iso</sub> = none, *E* = 2100 MHz, Dstrain = 0.1×|*D*|, Estrain = 0.1×|*E*|

(3) W132F (site I): Hstrain<sub>iso</sub> = 60 MHz, *E* = 400 MHz, Dstrain = 0.4×|*D*|, Estrain = 2×|*E*|

(4) W132F (site II): Hstrain<sub>iso</sub> = none, *E* = 2100 MHz, Dstrain = 0.1×|*D*|, Estrain = 0.1×|*E*|

**Table S2.** Fine structure parameters,  $D$  and  $E$  (MHz), of the Mn(II) binding sites in WT OxDC and the Mn-containing W132F OxDC variant calculated using both the hybrid B3LYP<sup>2</sup> and the non-hybrid BP86<sup>3</sup> functional in conjunction with double-zeta<sup>4</sup> (SVP) and triple-zeta<sup>5</sup> (TZVP) basis sets. The spin-spin (SSC) and spin-orbit (SOC) contributions to  $D$  and  $E$  are also reported (MHz).

|                               | <i>Theory Level</i> | $D$   | $E/D$ | $D$ (SSC) | $E$ (SSC) | $D$ (SOC) | $E$ (SOC) |
|-------------------------------|---------------------|-------|-------|-----------|-----------|-----------|-----------|
| WT OxDC (N-Term)              | B3LYP/TZVP          | -1170 | 0.11  | 240       | 90        | -1410     | -220      |
| WT OxDC (N-Term)              | B3LYP/SVP           | 920   | 0.09  | -490      | -10       | 1410      | 90        |
| WT OxDC (N-Term)              | BP86/TZVP           | 1100  | 0.17  | -520      | 130       | 1620      | 60        |
| WT OxDC (N-Term)              | BP86/SVP            | 1010  | 0.21  | -550      | 120       | 1560      | 90        |
| WT OxDC (C-Term) <sup>a</sup> | B3LYP/TZVP          | -7130 | 0.13  | -60       | -620      | -7070     | -300      |
| WT OxDC (C-Term) <sup>a</sup> | B3LYP/SVP           | -3780 | 0.18  | -100      | -510      | -3680     | -160      |
| WT OxDC (C-Term) <sup>a</sup> | BP86/TZVP           | -3290 | 0.19  | -80       | -310      | -3210     | -300      |
| WT OxDC (C-Term) <sup>a</sup> | BP86/SVP            | -2850 | 0.23  | -150      | -440      | -2700     | -210      |
| W132F (N-Term) <sup>b</sup>   | B3LYP/TZVP          | -2100 | 0.23  | 620       | 160       | -2720     | -650      |
| W132F (N-Term) <sup>b</sup>   | B3LYP/SVP           | -1340 | 0.29  | 610       | 210       | -1950     | -600      |
| W132F (N-Term) <sup>b</sup>   | BP86/SVP            | 1130  | 0.24  | -660      | -230      | 1790      | 500       |
| W132F (N-Term) <sup>c</sup>   | B3LYP/TZVP          | -1350 | 0.10  | 210       | 250       | -1560     | -390      |
| W132F (N-Term) <sup>c</sup>   | B3LYP/SVP           | 1190  | 0.11  | -530      | 70        | 1720      | 60        |
| W132F (N-Term) <sup>c</sup>   | BP86/SVP            | 1310  | 0.15  | -580      | 130       | 1890      | 60        |

<sup>a</sup> Cluster model containing hydroxide as the fifth ligand with a hydrogen bond to a solvent water (Figure 7d in main text). <sup>b</sup> Initial structure for QM/MM optimization based on the X-ray crystal structure of Co(II)-containing W132F OxDC variant. <sup>c</sup> Initial structure for QM/MM optimization from *in silico* modification of the X-ray crystal structure of WT OxDC (1UW8).

**Figure S1.** Simulated powder EPR spectra of the lowest energy transition  $|-5/2\rangle \leftrightarrow |-3/2\rangle$  when  $D = -3500$  MHz (black) and  $D = +3500$  MHz (red) at 326.4 GHz assuming  $E = 500$  MHz. These simulations illustrate how the sign of  $D$  can be extracted from the shape of the EPR spectrum at very low temperatures where only the lowest spin state has appreciable Boltzmann population.

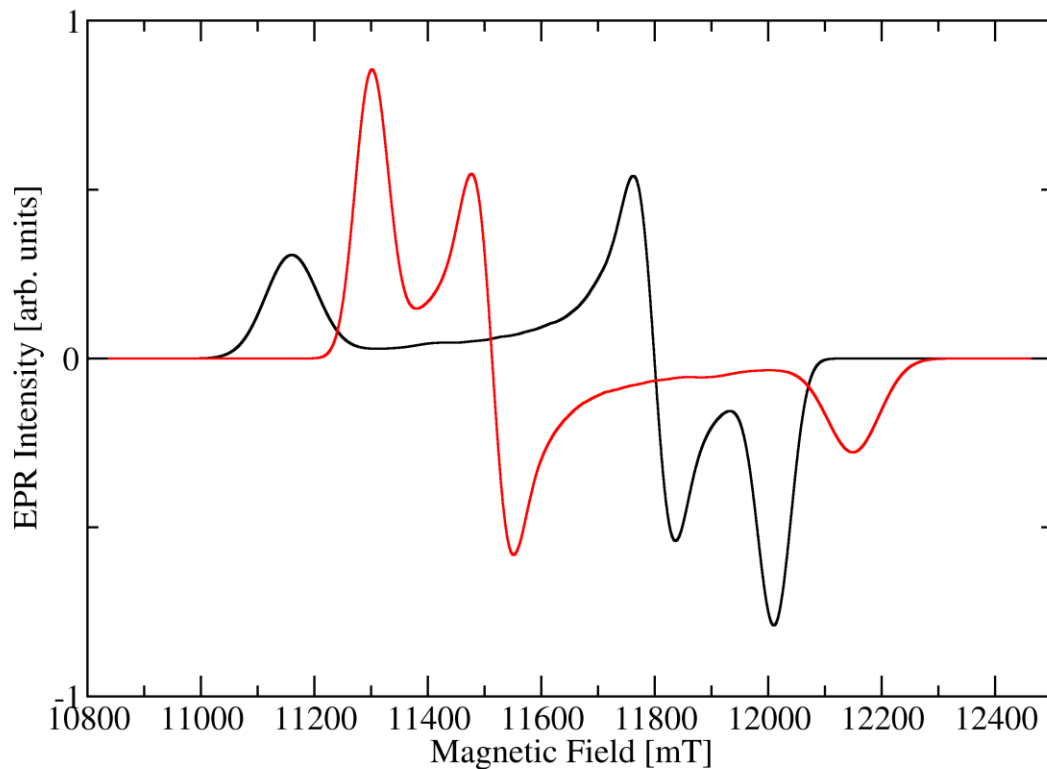

**Figure S2.** Simulated EPR spectra of the central sextet transition  $|-1/2\rangle \leftrightarrow |+1/2\rangle$  when  $|D| = 1200$  MHz and  $|E| = 200$  MHz (black),  $|D| = 4100$  MHz and  $|E| = 1000$  MHz (red) and  $|D| = 10600$  MHz and  $|E| = 2000$  MHz (green) at 326.4 GHz. This graph illustrates how the magnitude of the zero field splitting affects the shape of the central sextet. When there is spectral overlap between Mn(II) sites of variable size of  $D$ , the site with the largest  $D$  tends to have a weaker and more spread-out spectrum. In the case of OxDC it can usually only be recognized by a few of the low-field peaks and the Pake pattern at high fields. Since the effect of  $D$  on the lineshape is of second order, i.e., dependent on the square, the sign of  $D$  cannot be extracted from the spectrum.

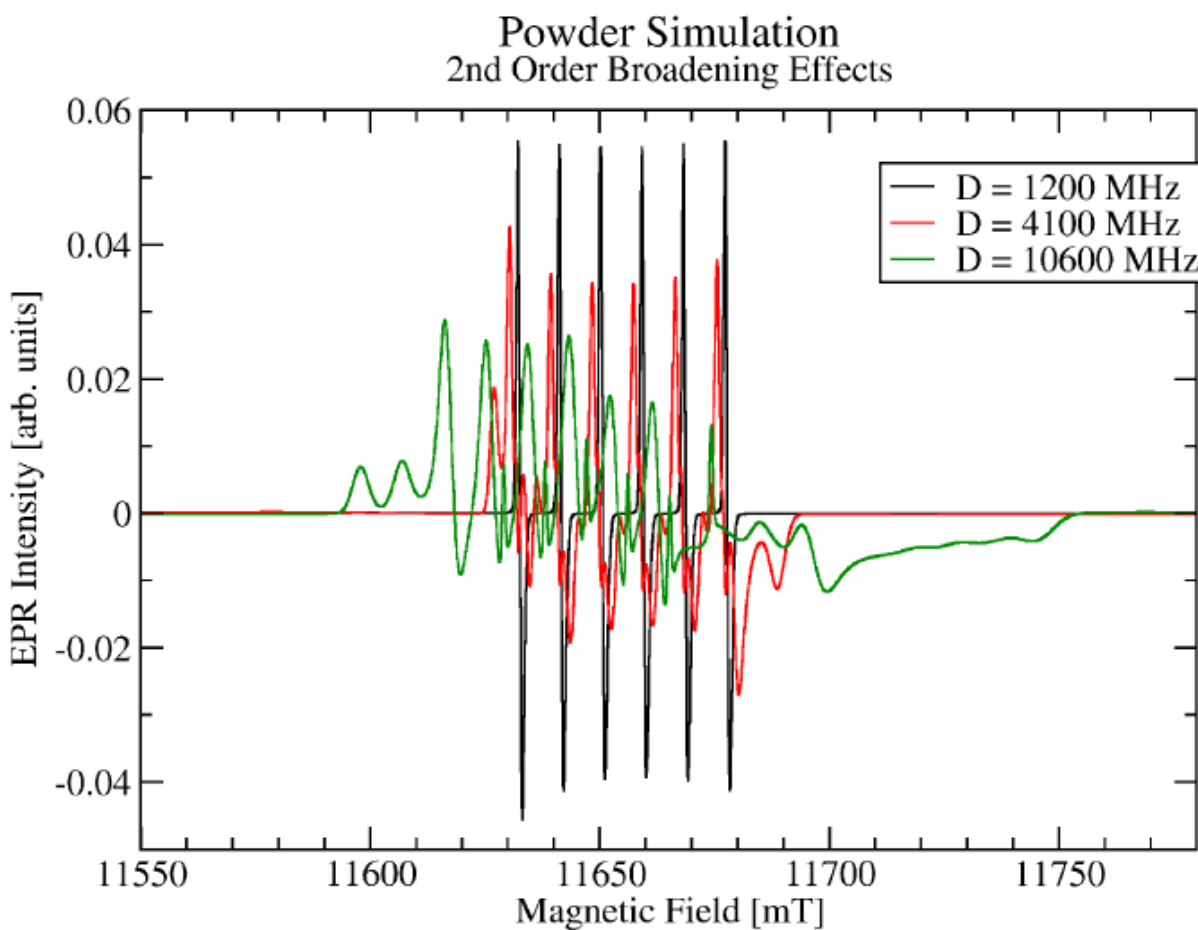

**Figure S3.** High-field (326.4 GHz) EPR spectra of WT O<sub>x</sub>DC taken at 3 K (blue) together with spectral simulations. The field modulation amplitude was 19.5 G and the sweep speed 2 mT/s. The sample temperature was set to 3 K. Lines from spectral simulations correspond to a single Mn(II) species (site I) (green) and a single Mn(II) species (site II) (cyan). The sum of site I and site II simulations is also shown (red). The simulation parameters are the same as those given in Figure 2 (main text).

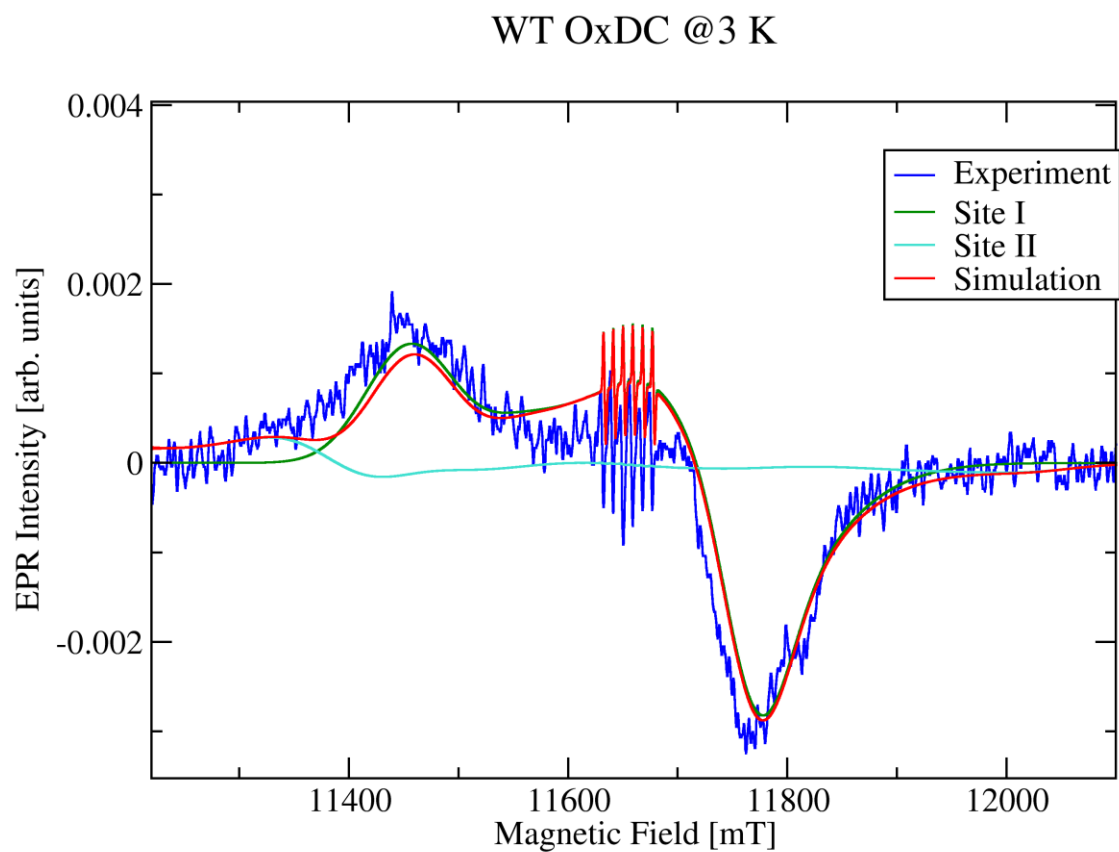

**Figure S4.** High-field (326.4 GHz) EPR spectra of WT OxDC taken at 40K (blue) together with spectral simulations. The spectrum depicts primarily the central sextet lines and their simulations. The field modulation amplitude was 19.5 G and the sweep speed 2 mT/s. Sample temperature was set to 40 K. Lines from spectral simulations correspond to a single Mn(II) species (site I) (green) and a single Mn(II) species (site II) (cyan). The sum of site I and site II simulations is also shown (red). The simulation parameters are the same as those given in Figure 2 (main text).

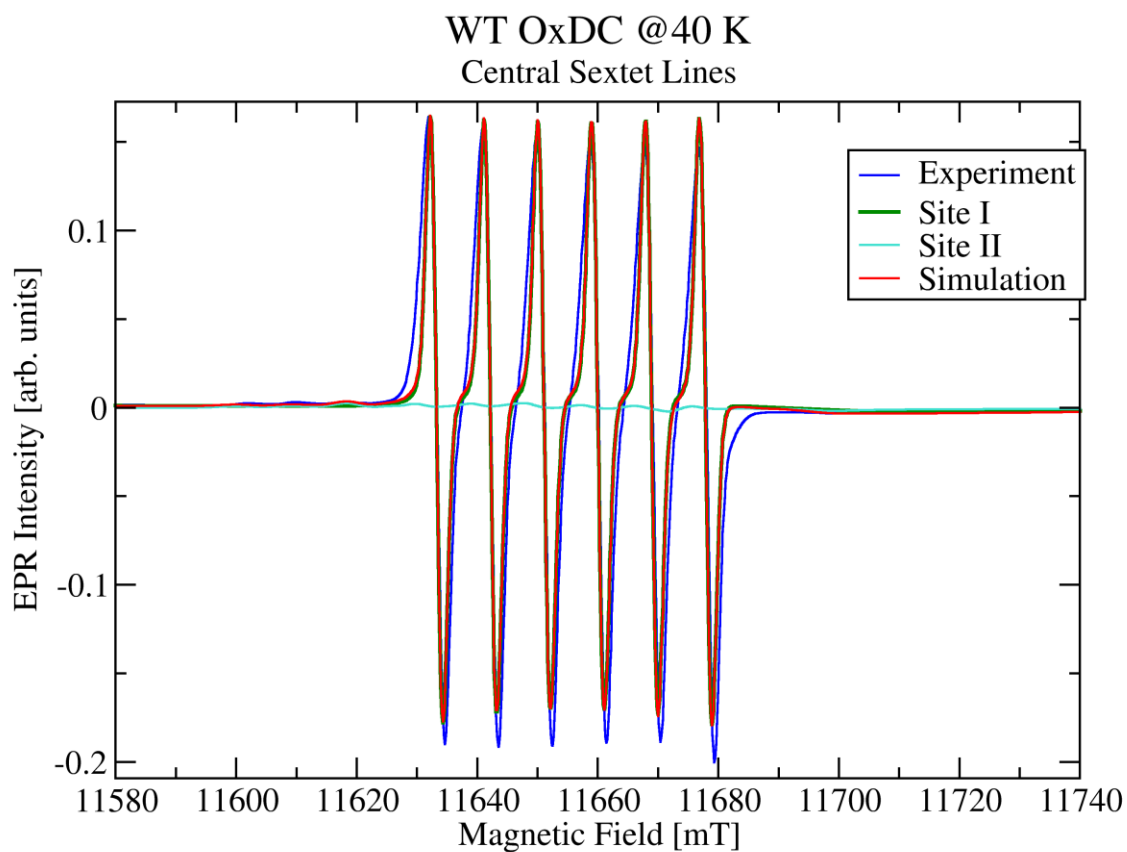

**Figure S5.** Michaelis-Menten plot used to obtain the steady-state kinetic parameters. Error bars represent the standard error of three independent measurements. Reaction mixtures consisted of enzyme (15  $\mu\text{g}$ ) and potassium oxalate (2 – 100 mM) dissolved in 50 mM NaOAc, pH 4.2, containing 0.5 mM *o*-phenylenediamine and 0.2% Triton-X100 (100  $\mu\text{L}$  total volume). Turnover was initiated by the addition of enzyme. After incubation at 25  $^{\circ}\text{C}$ , the reaction was quenched by the addition of 1.0 M aq. NaOH (10  $\mu\text{L}$ ), and the formate quantified using the NADH absorption at 340 nm in an assay mixture containing formate dehydrogenase.<sup>6</sup>

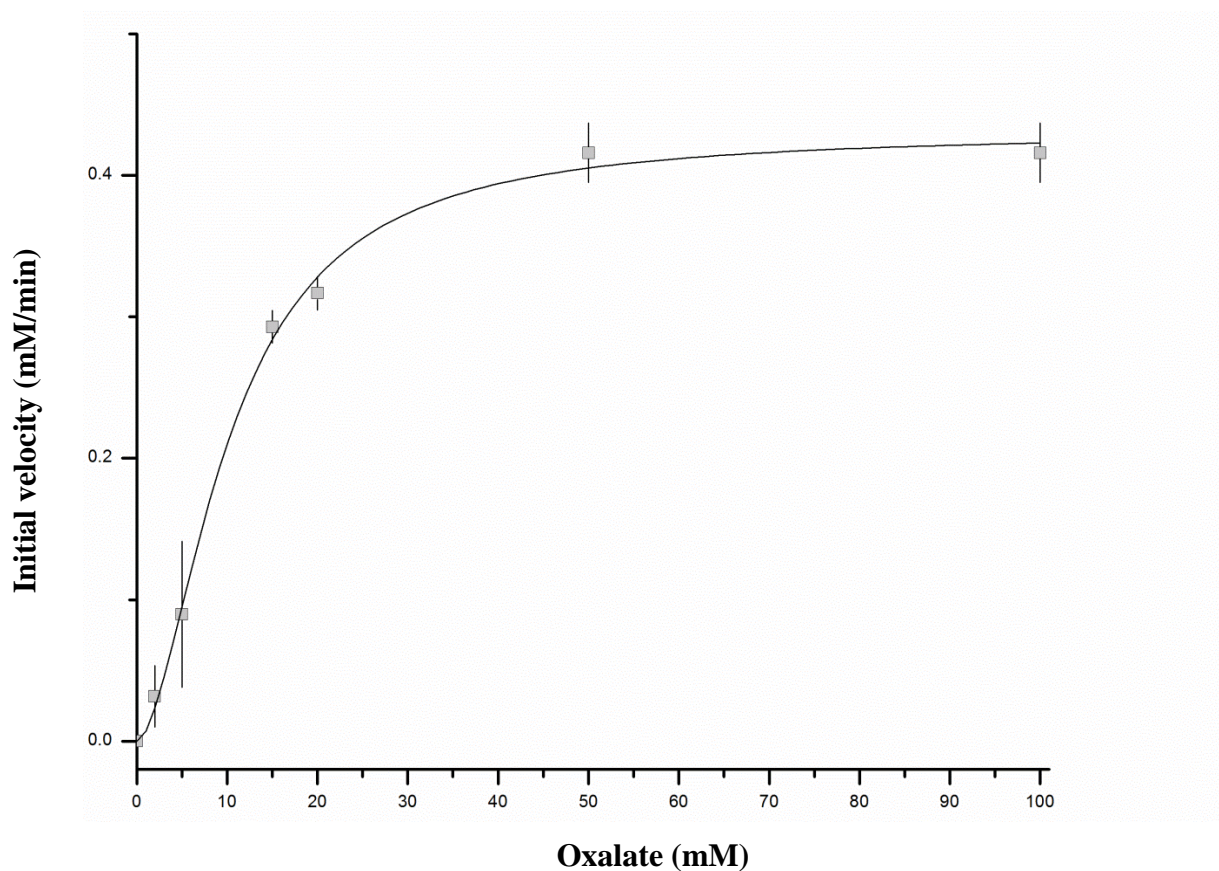



**Figure S6.** The active site of the Co(II)-containing W132F OxDC variant. Protein residues are rendered in stick representation with waters (red) and the cobalt ion (pink) shown as spheres. Ligand-metal coordinate bond lengths (dotted lines) are labeled in black and pink for the Co(II)-containing W132F OxDC variant and Mn(II)-containing WT OxDC (1UW8), respectively.

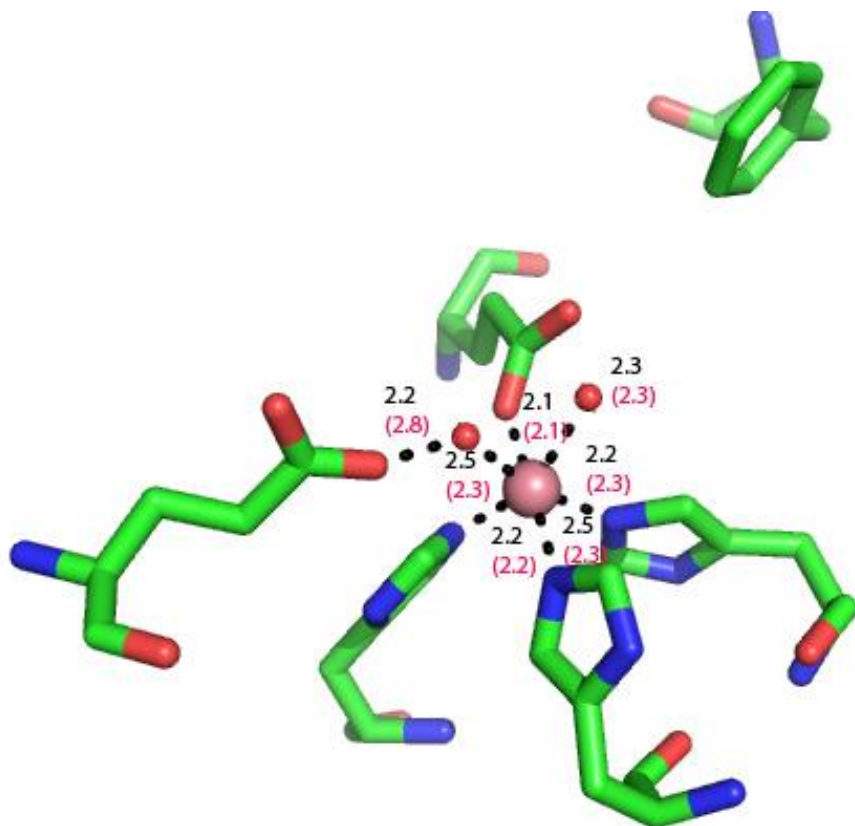

**Figure S7.** (A) Stereo view of the active site of the Co-containing W132F OxDC variant showing the simulated-annealing composite omit electron density map calculated with coefficients  $2F_o - F_c$  and contoured at  $d > 2\sigma$  (cyan cages). (B) Same structure rotated by  $90^\circ$  about the x-, y-, and z-axes. In both figures, protein residues are rendered in stick representation with waters (red) and the cobalt ion (pink) shown as spheres.

(A)

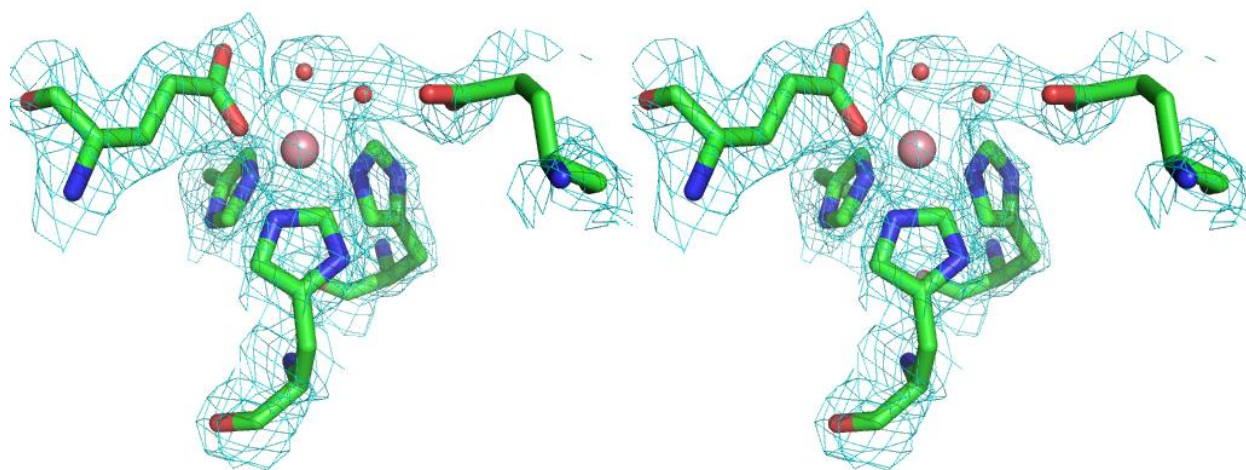

(B)

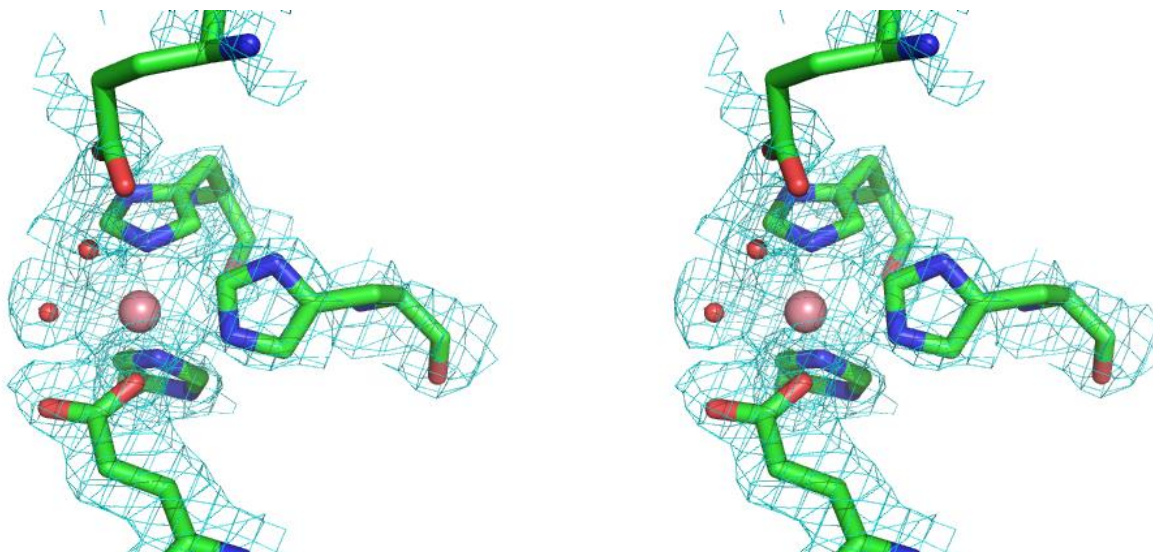

**Figure S8.** High-field (326.4 GHz) EPR spectra of the Mn-containing W132F O<sub>x</sub>DC variant taken at 3 K (blue) together with spectral simulations. The field modulation amplitude was 20 G and the sweep speed 2 mT/s. Sample temperature was set to 3 K. Lines from spectral simulations correspond to a single Mn(II) species (N terminal site I) (green) and a single Mn(II) species (C-terminal site II) (cyan). The sum of site I and site II simulations is also shown (red). The simulation parameters are the same as those given in Figure 6 (main text).

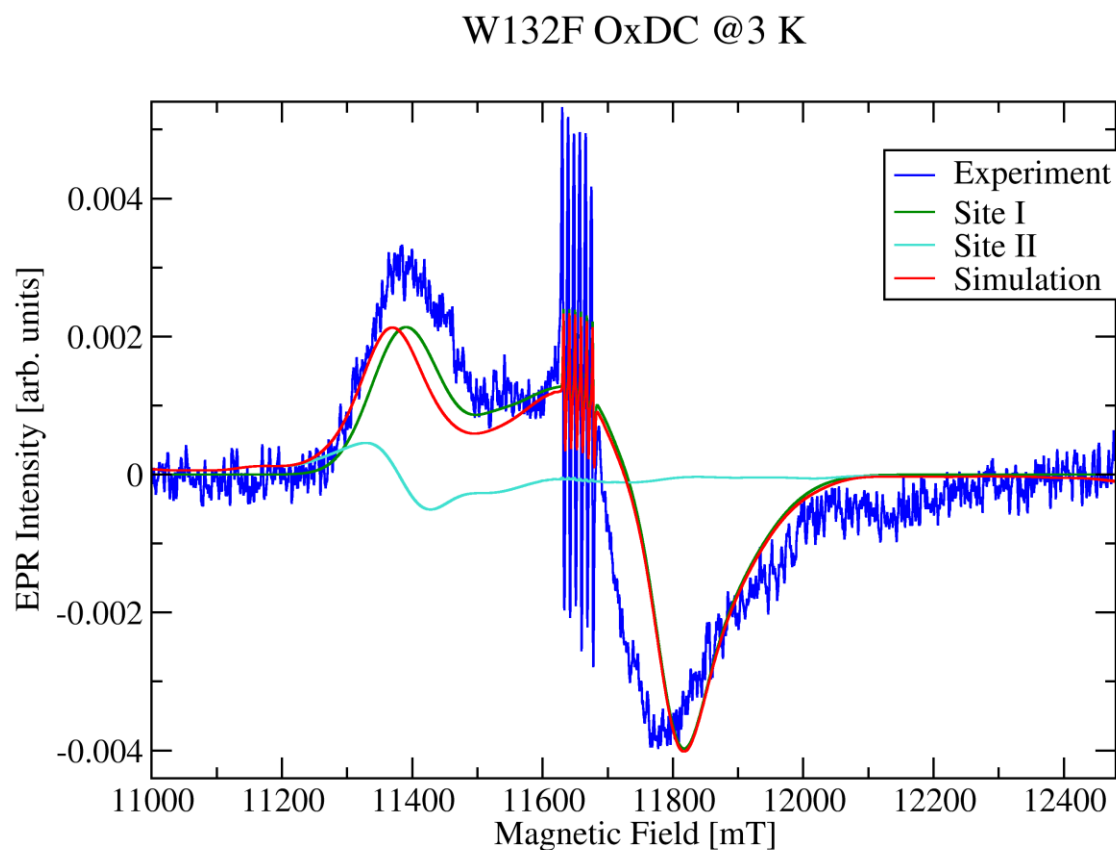

**Figure S9.** High-field (326.4 GHz) EPR spectra of the Mn-containing W132F OxDc variant taken at 40K (blue) together with spectral simulations. The spectrum depicts primarily the central sextet lines and their simulations. The field modulation amplitude was 19.5 G and the sweep speed 2 mT/s. Sample temperature was set to 40 K. Lines from spectral simulations correspond to a single Mn(II) species (N terminal site I) (green) and a single Mn(II) species (C-terminal site II) (cyan). The sum of site I and site II simulations is also shown (red). The simulation parameters are the same as those given in Figure 6 (main text).

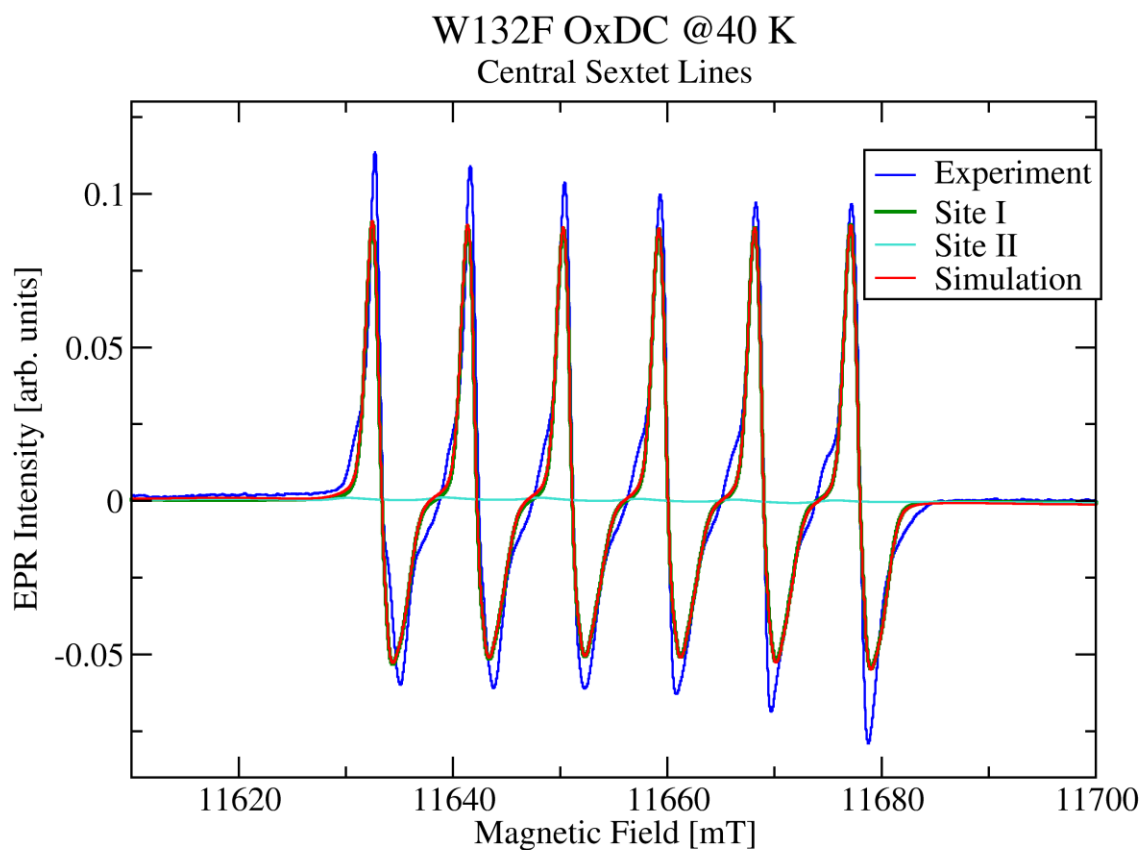

**Figure S10.** High-field (326.4 GHz) EPR spectra of the Mn-containing W132F OxDC variant taken at 3K (black) and 40K (blue) together with spectral simulations. Note that the central part of the spectrum at 40 K together with the corresponding spectral simulation of site I is removed for clarity. The enzyme (40 mg/mL) was dissolved in 50 mM Tris buffer containing 500 mM NaCl, pH 8.5. Lines from spectral simulations correspond to a single Mn(II) species (site I) with small zfs at 3 K (red) and 40 K (green), and a single Mn(II) species (site II) with very large zfs at 40 K (cyan). The sum of site I and site II simulations at 40 K is also shown (magenta). In this case, however, a broad non-Gaussian spectral distribution of zfs values was assumed ranging from  $D = -1600$  MHz through  $D = -2100$  MHz and from  $E = 100$  MHz through  $E = |D|/3$ .

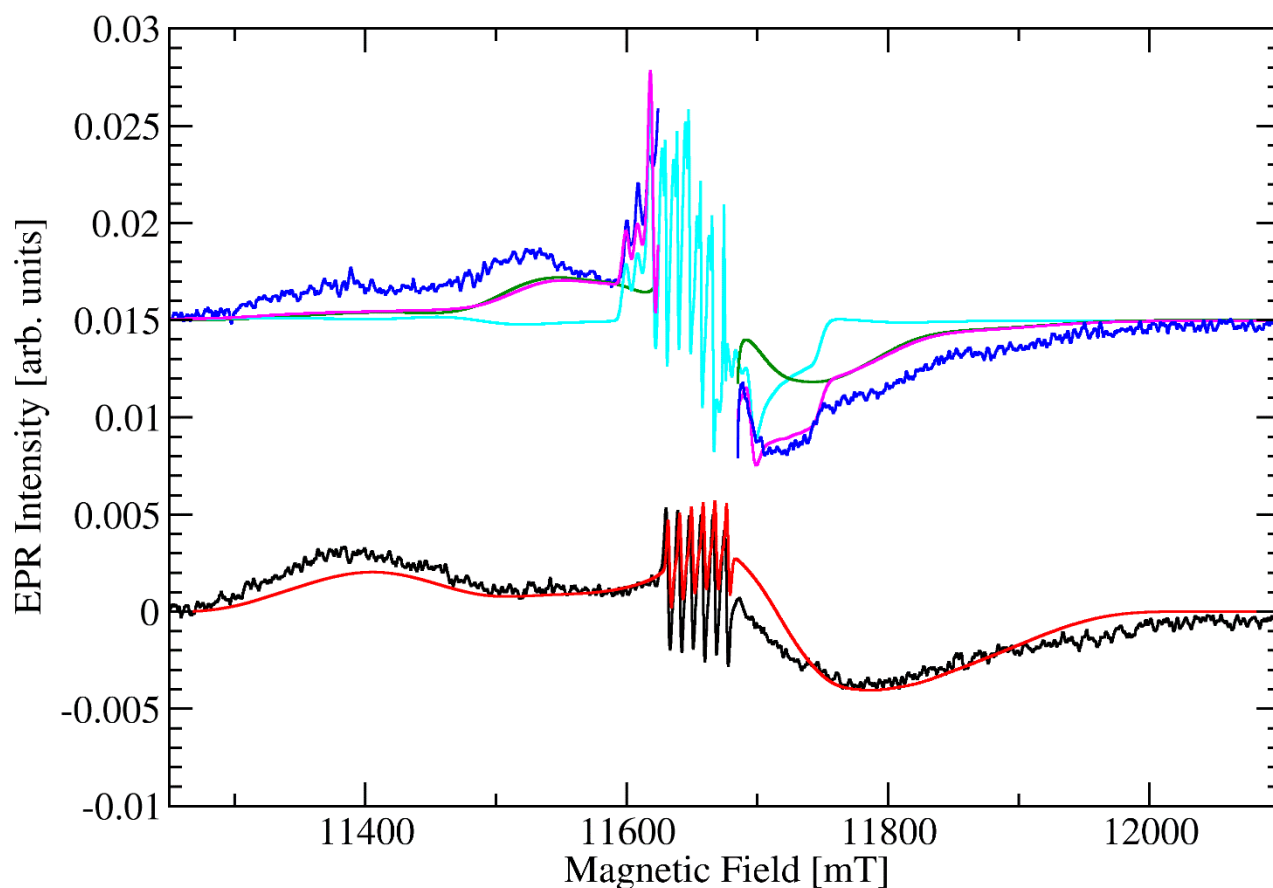

*Overlap extension mutagenesis and plasmid purification.* The gene encoding the W132F OxDC variant was constructed using the overlap extension method<sup>7</sup> with the following primers:

**OxDC (NdeI):**

Forward: 5' – GGAGGAAACATCATATGAAAAAACA – 3'

**OxDC (XhoI):**

Reverse: 5' – GTGGTGCTCGAGTTTACTGCATTTTC – 3'

**W132F:**

Forward: 5' – GGTGAAGGAGACCTTTTCTACTTCCC – 3'

Reverse: 5' – GGCAGGCCTGACGGGAAGTAGAAA – 3'

Briefly, polymerase chain reactions (PCRs) were conducted in solutions containing 40  $\mu$ L H<sub>2</sub>O, 5  $\mu$ L of *PfuTurbo* AD 10x buffer, 50 ng of template OxDC in pET32a, 0.25 mM dNTP mixture, 0.2  $\mu$ M of forward primer, 0.2  $\mu$ M of reverse primer, 1  $\mu$ L of *PfuTurbo* AD enzyme (50  $\mu$ L total volume). The first set of PCRs were run for four minutes at 95 °C followed by 30 cycles of denaturing at 95 °C for 30 s, annealing at 55 °C for 1 min, and extension at 72 °C for 7 min. After a final extension phase at 72 °C for 10 min, the solution was cooled to 4 °C. A second set of PCRs to stitch together PCR products from the first round were then performed using solutions containing 40  $\mu$ L H<sub>2</sub>O, 5  $\mu$ L *PfuTurbo* AD 10x buffer, 1  $\mu$ L of each of the first round PCR mixtures, 0.2 mM dNTP mixture, 0.2  $\mu$ M of OxDC forward *NdeI* primer, 0.2  $\mu$ M OxDC *XhoI* reverse primer, and 1  $\mu$ L *PfuTurbo* AD enzyme (50  $\mu$ L total volume). After following an identical set of denaturing, annealing and extension cycles to those used in the first round of PCRs, DNA was purified using a Wizard kit (Promega). The purified DNA was cut at 37 °C for 1-2 hours using the *XhoI* and *NdeI* restriction enzymes (New England Biolabs) and ligated into pET32a (Novagen), which had been cut previously with *NdeI* and *XhoI* and treated with calf intestinal alkaline phosphatase. Ligation with T4 DNA ligase (New England Biolabs) was performed at 16° C for 16 hours. JM109 cells were transformed with the ligation mixture (1-5  $\mu$ L), plated on Luria broth with 0.1 mg/mL ampicillin and grown overnight at 37 °C. The resulting colonies were grown overnight at 37 °C in LBA (50 mL) and plasmids purified using a Wizard kit (Promega). DNA sequencing was then performed to ensure that the correct mutation had been introduced into the gene (Interdisciplinary Center for Biotechnology Research at the University of Florida).

## Literature Cited

1. Stoll, S.; Schweiger, A. *J. Magn. Reson.* **2006**, *178*, 42-55.
2. Becke, A. D. *J. Chem. Phys.* **1993**, *98*, 1372-1377.
3. (a) Becke, A. D. *Phys. Rev. A* **1988**, *38*, 3098-3100. (b) Perdew, J. P. *Phys. Rev. B* **1986**, *33*, 8822-8824.
4. Schäfer, A.; Horn, H.; Ahlrichs, R. *J. Chem. Phys.* **1992**, *97*, 2571-2577.
5. Weigend, F.; Ahlrichs, R. *Phys. Chem. Chem. Phys.* **2005**, *7*, 3297-3305.
6. Schutte, H.; Flossdorf, J.; Sahm, H.; Kula, M. R. *Eur. J. Biochem.* **1976**, *62*, 152-160.
7. Ho, S. N.; Hunt, H. D.; Horton, R. M.; Pullen, J. K.; Lease, L. R. *Gene* **1989**, *77*, 51-59.

**Cartesian coordinates for the cluster models used to calculate zfs parameters (numbers refer to figures in the main text).**

(A) WT OxDC (N-terminal Mn(II) site; Figure 7a)  $D = -1170$  MHz,  $E/D = 0.11$ :

|   |        |        |        |
|---|--------|--------|--------|
| H | -1.430 | 4.017  | 5.967  |
| C | -2.184 | 3.414  | 5.446  |
| H | -2.446 | 2.579  | 6.101  |
| H | -3.083 | 4.032  | 5.325  |
| C | -1.685 | 2.895  | 4.143  |
| N | -1.187 | 3.703  | 3.133  |
| H | -1.094 | 4.709  | 3.171  |
| C | -0.831 | 2.910  | 2.087  |
| H | -0.392 | 3.281  | 1.172  |
| N | -1.077 | 1.645  | 2.363  |
| C | -1.601 | 1.624  | 3.640  |
| H | -1.855 | 0.697  | 4.130  |
| H | -4.969 | -3.433 | 4.496  |
| C | -5.164 | -2.836 | 3.597  |
| H | -5.886 | -3.383 | 2.979  |
| H | -5.642 | -1.905 | 3.914  |
| C | -3.901 | -2.528 | 2.856  |
| N | -3.117 | -3.494 | 2.241  |
| H | -3.365 | -4.468 | 2.136  |
| C | -2.032 | -2.888 | 1.691  |
| H | -1.257 | -3.398 | 1.139  |
| N | -2.062 | -1.588 | 1.923  |
| C | -3.224 | -1.356 | 2.638  |
| H | -3.507 | -0.360 | 2.943  |
| H | 1.585  | -5.397 | -0.762 |
| C | 1.153  | -4.439 | -0.451 |
| H | 0.123  | -4.402 | -0.821 |
| H | 1.123  | -4.421 | 0.644  |
| C | 1.972  | -3.279 | -1.007 |
| H | 3.024  | -3.376 | -0.714 |
| H | 1.969  | -3.301 | -2.105 |
| C | 1.517  | -1.881 | -0.588 |
| O | 0.384  | -1.767 | 0.000  |
| O | 2.290  | -0.924 | -0.858 |
| H | 3.654  | 0.100  | 6.278  |
| C | 3.872  | -0.131 | 5.229  |
| H | 4.387  | 0.729  | 4.795  |
| H | 4.570  | -0.977 | 5.200  |
| C | 2.625  | -0.424 | 4.452  |
| N | 1.709  | -1.381 | 4.863  |
| H | 1.784  | -1.936 | 5.702  |
| C | 0.707  | -1.454 | 3.947  |
| H | -0.139 | -2.115 | 4.066  |
| N | 0.919  | -0.595 | 2.965  |
| C | 2.107  | 0.050  | 3.271  |



|    |        |        |        |
|----|--------|--------|--------|
| H  | 2.510  | 0.804  | 2.611  |
| Mn | -0.453 | -0.154 | 1.099  |
| O  | -0.196 | 3.100  | -1.523 |
| H  | 0.157  | 3.000  | -2.421 |
| H  | -1.175 | 2.947  | -1.608 |
| O  | -2.120 | 0.558  | -0.369 |
| H  | -2.442 | 0.047  | -1.133 |
| H  | -2.351 | 1.482  | -0.628 |
| O  | 1.019  | 1.184  | 0.148  |
| H  | 1.587  | 0.504  | -0.328 |
| H  | 0.633  | 1.791  | -0.527 |

(B) WT OxDC (C-terminal Mn(II) site; Figure 7d) D = -7130 MHz, E/D = 0.13:

|   |        |        |        |
|---|--------|--------|--------|
| H | 12.411 | 6.938  | 14.520 |
| C | 12.683 | 7.667  | 15.269 |
| H | 11.822 | 7.838  | 15.922 |
| H | 13.475 | 7.236  | 15.891 |
| C | 13.090 | 8.976  | 14.671 |
| N | 14.350 | 9.233  | 14.141 |
| H | 15.146 | 8.585  | 14.112 |
| C | 14.353 | 10.522 | 13.682 |
| H | 15.207 | 11.017 | 13.250 |
| N | 13.168 | 11.097 | 13.869 |
| C | 12.376 | 10.139 | 14.483 |
| H | 11.352 | 10.338 | 14.758 |
| H | 6.934  | 11.715 | 14.408 |
| C | 7.121  | 12.735 | 14.108 |
| H | 6.780  | 12.841 | 13.073 |
| H | 6.519  | 13.407 | 14.732 |
| C | 8.582  | 13.033 | 14.221 |
| N | 9.231  | 13.207 | 15.442 |
| H | 8.778  | 13.298 | 16.357 |
| C | 10.572 | 13.329 | 15.195 |
| H | 11.325 | 13.479 | 15.953 |
| N | 10.816 | 13.237 | 13.890 |
| C | 9.580  | 13.064 | 13.277 |
| H | 9.471  | 12.985 | 12.208 |
| H | 9.538  | 17.271 | 10.213 |
| C | 10.263 | 16.516 | 10.479 |
| H | 9.817  | 15.902 | 11.266 |
| H | 10.428 | 15.880 | 9.600  |
| C | 11.607 | 17.112 | 10.977 |
| H | 12.109 | 17.695 | 10.201 |
| H | 11.418 | 17.807 | 11.807 |
| C | 12.617 | 16.067 | 11.491 |
| O | 12.100 | 15.102 | 12.186 |
| O | 13.849 | 16.213 | 11.250 |
| H | 13.676 | 8.434  | 8.727  |
| C | 13.543 | 9.449  | 8.382  |

|    |        |        |        |
|----|--------|--------|--------|
| H  | 14.507 | 9.839  | 8.039  |
| H  | 12.902 | 9.385  | 7.494  |
| C  | 12.963 | 10.370 | 9.410  |
| N  | 11.605 | 10.377 | 9.735  |
| H  | 10.853 | 9.859  | 9.270  |
| C  | 11.403 | 11.348 | 10.674 |
| H  | 10.421 | 11.549 | 11.066 |
| N  | 12.543 | 11.963 | 10.985 |
| C  | 13.519 | 11.354 | 10.197 |
| H  | 14.548 | 11.678 | 10.238 |
| Mn | 12.894 | 13.355 | 12.919 |
| O  | 14.824 | 13.420 | 13.445 |
| H  | 15.287 | 14.264 | 13.294 |
| O  | 13.732 | 13.683 | 15.813 |
| H  | 14.286 | 13.512 | 14.963 |
| H  | 13.947 | 14.617 | 16.036 |

(C) W132F OxDC variant (N-terminal Mn(II) site; initial structure based on the X-ray crystal structure of the Co(II)-containing variant) D = -2100 MHz, E/D = 0.23:

|    |        |        |        |
|----|--------|--------|--------|
| C  | 16.601 | 12.822 | 11.771 |
| C  | 17.488 | 12.230 | 10.899 |
| N  | 17.461 | 10.879 | 11.242 |
| C  | 16.587 | 10.708 | 12.279 |
| N  | 16.049 | 11.874 | 12.640 |
| C  | 18.333 | 12.741 | 9.765  |
| Mn | 14.754 | 12.337 | 14.555 |
| O  | 14.017 | 14.265 | 13.588 |
| N  | 16.643 | 13.313 | 15.244 |
| C  | 17.263 | 14.285 | 14.571 |
| N  | 18.585 | 14.314 | 14.884 |
| C  | 18.844 | 13.307 | 15.811 |
| C  | 17.626 | 12.705 | 16.022 |
| C  | 20.196 | 12.994 | 16.377 |
| N  | 15.083 | 10.538 | 15.842 |
| C  | 14.296 | 10.130 | 16.838 |
| N  | 14.389 | 8.773  | 16.989 |
| C  | 15.272 | 8.289  | 16.024 |
| C  | 15.693 | 9.397  | 15.339 |
| C  | 15.514 | 6.840  | 15.773 |
| O  | 13.181 | 11.234 | 13.593 |
| C  | 12.180 | 11.749 | 12.939 |
| O  | 11.865 | 12.978 | 12.955 |
| C  | 11.334 | 10.790 | 12.104 |
| C  | 10.251 | 10.089 | 12.968 |
| O  | 13.500 | 13.217 | 16.390 |
| H  | 20.866 | 12.543 | 15.660 |
| H  | 20.064 | 12.304 | 17.215 |
| H  | 20.698 | 13.887 | 16.763 |
| H  | 19.266 | 14.926 | 14.446 |

|   |        |        |        |
|---|--------|--------|--------|
| H | 16.802 | 14.952 | 13.861 |
| H | 17.397 | 11.869 | 16.663 |
| H | 16.475 | 6.480  | 16.109 |
| H | 15.445 | 6.646  | 14.695 |
| H | 14.728 | 6.253  | 16.254 |
| H | 13.909 | 8.221  | 17.694 |
| H | 13.654 | 10.760 | 17.427 |
| H | 16.369 | 9.440  | 14.504 |
| H | 9.700  | 9.324  | 12.441 |
| H | 9.530  | 10.828 | 13.335 |
| H | 10.693 | 9.615  | 13.849 |
| H | 11.994 | 10.047 | 11.644 |
| H | 10.870 | 11.375 | 11.305 |
| H | 19.340 | 13.017 | 10.041 |
| H | 17.852 | 13.599 | 9.283  |
| H | 18.448 | 11.967 | 8.998  |
| H | 18.036 | 10.149 | 10.835 |
| H | 16.343 | 9.732  | 12.662 |
| H | 16.303 | 13.857 | 11.814 |
| H | 12.551 | 13.285 | 16.185 |
| H | 13.578 | 13.613 | 17.324 |
| H | 13.100 | 13.877 | 13.308 |
| H | 13.815 | 14.928 | 14.271 |

(D) W132F OxDC variant (N-terminal Mn(II) site; initial structure derived from the X-ray crystal structure of WT OxDC (*in silico* substitution)) D = -1350 MHz, E/D = 0.10:

|   |        |        |       |
|---|--------|--------|-------|
| H | -1.239 | 4.539  | 5.523 |
| C | -1.951 | 3.804  | 5.126 |
| H | -2.074 | 3.027  | 5.885 |
| H | -2.921 | 4.307  | 5.010 |
| C | -1.483 | 3.199  | 3.854 |
| N | -1.144 | 3.939  | 2.733 |
| H | -1.175 | 4.947  | 2.659 |
| C | -0.775 | 3.077  | 1.749 |
| H | -0.438 | 3.386  | 0.771 |
| N | -0.862 | 1.832  | 2.171 |
| C | -1.294 | 1.896  | 3.479 |
| H | -1.410 | 1.005  | 4.078 |
| H | -4.273 | -3.414 | 4.818 |
| C | -4.531 | -2.845 | 3.916 |
| H | -5.240 | -3.444 | 3.330 |
| H | -5.049 | -1.938 | 4.237 |
| C | -3.318 | -2.485 | 3.124 |
| N | -2.488 | -3.424 | 2.531 |
| H | -2.670 | -4.416 | 2.481 |
| C | -1.465 | -2.772 | 1.918 |
| H | -0.673 | -3.251 | 1.362 |
| N | -1.582 | -1.468 | 2.088 |
| C | -2.733 | -1.281 | 2.831 |

|    |        |        |        |
|----|--------|--------|--------|
| H  | -3.073 | -0.293 | 3.101  |
| H  | 2.088  | -5.233 | -0.549 |
| C  | 1.596  | -4.288 | -0.294 |
| H  | 0.541  | -4.374 | -0.577 |
| H  | 1.648  | -4.163 | 0.793  |
| C  | 2.264  | -3.123 | -1.021 |
| H  | 3.341  | -3.099 | -0.818 |
| H  | 2.175  | -3.248 | -2.108 |
| C  | 1.722  | -1.733 | -0.687 |
| O  | 0.649  | -1.664 | 0.019  |
| O  | 2.357  | -0.743 | -1.124 |
| H  | 4.167  | 0.945  | 5.974  |
| C  | 4.362  | 0.641  | 4.938  |
| H  | 4.815  | 1.491  | 4.420  |
| H  | 5.104  | -0.166 | 4.951  |
| C  | 3.108  | 0.221  | 4.236  |
| N  | 2.267  | -0.750 | 4.754  |
| H  | 2.399  | -1.231 | 5.631  |
| C  | 1.240  | -0.953 | 3.888  |
| H  | 0.441  | -1.653 | 4.093  |
| N  | 1.366  | -0.164 | 2.836  |
| C  | 2.522  | 0.571  | 3.042  |
| H  | 2.855  | 1.292  | 2.310  |
| Mn | -0.145 | 0.001  | 1.042  |
| O  | -0.232 | 3.009  | -1.866 |
| H  | 0.065  | 2.768  | -2.758 |
| H  | -1.203 | 2.801  | -1.851 |
| O  | -1.991 | 0.444  | -0.355 |
| H  | -2.240 | -0.188 | -1.049 |
| H  | -2.259 | 1.315  | -0.735 |
| O  | 1.156  | 1.346  | -0.098 |
| H  | 1.697  | 0.643  | -0.586 |
| H  | 0.696  | 1.889  | -0.782 |
